# Supplementary material for: Total metabolic tumor volume as a survival predictor for patients with diffuse large B-cell lymphoma in the GOYA study
Source: PubMed Central journal article supplement — Haematologica. 2021 Aug 19;107(7):1633–42. doi: 10.3324/haematol.2021.278663 (PMC9244811; doi:10.3324/haematol.2021.278663), 2021-08-19
Supplement: 2021_278663_KOSTAKOGLU_SUPPL.pdf [file 2021_278663_KOSTAKOGLU_SUPPL.pdf]

# Total metabolic tumor volume as a survival predictor for patients with diffuse large B-cell lymphoma in the GOYA study

Lale Kostakoglu,<sup>1</sup> Federico Mattiello,<sup>2</sup> Maurizio Martelli,<sup>3</sup> Laurie H. Sehn,<sup>4</sup> David Belada,<sup>5</sup> Chiara Ghiggi,<sup>6</sup> Neil Chua,<sup>7</sup> Eva González-Barca,<sup>8</sup> Xiaonan Hong,<sup>9</sup> Antonio Pinto,<sup>10</sup> Yuankai Shi,<sup>11</sup> Yoichi Tatsumi,<sup>12</sup> Christopher Bolen,<sup>13</sup> Andrea Knapp,<sup>2</sup> Gila Sellam,<sup>2</sup> Tina Nielsen,<sup>2</sup> Deniz Sahin,<sup>2</sup> Umberto Vitolo<sup>14</sup> and Marek Trněný<sup>15</sup>

<sup>1</sup>Department of Radiology and Medical Imaging, University of Virginia, Charlottesville, VA, USA; <sup>2</sup>F. Hoffmann-La Roche Ltd, Basel, Switzerland; <sup>3</sup>Department of Translational and Precision Medicine, Sapienza University, Rome, Italy; <sup>4</sup>BC Cancer Center for Lymphoid Cancer and the University of British Columbia, Vancouver, British Columbia, Canada; <sup>5</sup>Fourth Department of Internal Medicine-Hematology, Charles University, Hospital and Faculty of Medicine, Hradec Králové, Czech Republic; <sup>6</sup>Universitaria San Martino, Genoa, Italy; <sup>7</sup>Cross Cancer Institute, University of Alberta, Edmonton, Alberta, Canada; <sup>8</sup>Institut Català d'Oncologia, Institut d'Investigació Biomèdica de Bellvitge, Universitat de Barcelona, Hospitalet de Llobregat, Barcelona, Spain; <sup>9</sup>Fudan University Shanghai Cancer Center, Shanghai, China; <sup>10</sup>Hematology-Oncology, Istituto Nazionale Tumori, Fondazione G. Pascale, IRCCS, Naples, Italy; <sup>11</sup>Department of Medical Oncology, Beijing Key Laboratory of Clinical Study on Anticancer Molecular Targeted Drugs, National Cancer Center/Cancer Hospital, Chinese Academy of Medical Sciences and Peking Union Medical College, Beijing, China; <sup>12</sup>Department of Patient Safety and Management, Kindai University Hospital and Department of Hematology and Rheumatology, Kindai University Faculty of Medicine, Osaka, Japan; <sup>13</sup>Genentech, Inc., South San Francisco, CA, USA; <sup>14</sup>Multidisciplinary Oncology Outpatient Clinic, Candiolo Cancer Institute, FPO-IRCCS, Candiolo, Turin, Italy and <sup>15</sup>First Department of Medicine, Charles University General Hospital, Prague, Czech Republic.

## Correspondence:

Lale Kostakoglu  
[lk3qf@virginia.edu](mailto:lk3qf@virginia.edu)

**Received:** March 1, 2021.

**Accepted:** August 4, 2021.

**Prepublished:** August 19, 2021.

<https://doi.org/10.3324/haematol.2021.278663>

©2022 Ferrata Storti Foundation

Haematologica material is published under a CC

BY-NC license 

## **SUPPLEMENTARY MATERIAL**

### **Total metabolic tumor volume as a survival predictor for patients with diffuse large B-cell lymphoma in the GOYA study**

Kostakoglu et al.

#### **Study design and PET assessments**

In brief, eligible patients were aged  $\geq 18$  years, with previously untreated, CD20-positive diffuse large B-cell lymphoma (DLBCL). Patients were randomly assigned in a 1:1 ratio to receive eight 21-day cycles of obinutuzumab 1000 mg by intravenous infusion (Days 1, 8, and 15 of Cycle 1, and Day 1 of Cycles 2–8) or rituximab 375 mg/m<sup>2</sup> by intravenous infusion (Day 1 of Cycles 1–8), plus six or eight cycles of standard-dose cyclophosphamide, doxorubicin, vincristine, and prednisone (CHOP) chemotherapy. The primary endpoint was investigator-assessed progression-free survival. Secondary endpoints included overall survival.

<sup>18</sup>F-fluorodeoxyglucose (FDG) positron emission tomography (PET)/computed tomography (CT) FDG-PET/CT scans followed a standardized protocol; baseline and FDG-PET/CT scans were mandatory at sites with access to a PET scanner. Each patient's blood glucose level was measured to ensure that it was between 72–180 mg/dL before intravenous injection of the radiotracer (FDG 370–740 MBq [10–20 mCi]). All centers followed a quality-control/assessment program for PET scans and acquired phantom PET scans were submitted to the contract research organization (ICON Medical Imaging, North Wales, PA, USA) for approval prior to image acquisition. PET images were segmented using a semi-automated workflow program (MIM Software Inc, OH, USA), with a tumor threshold of 1.5 times the mean SUV (SUV<sub>mean</sub>) of the liver +2 standard deviations. A minimum lesion volume of 1 mL was required for segmentation.

The prognostic value of the quantitative PET parameters was analyzed for the overall population and according to International Prognostic Index (IPI) risk categories and DLBCL cell-of-origin subtype. PET metrics were analyzed, adjusting for IPI score and cell-of-origin subtype.

### **Patient population**

Of 1,414 patients included in the GOYA study intent-to-treat (ITT) population, 1,305 (92.3%) were included in the PET ITT population. One hundred thirteen patients (8.0%) were not included in the PET ITT population, due to: not having evaluable lesions following surgical excision of a lesion prior to baseline PET imaging; having lesions that were too small, as we limited our evaluation to those lesions measuring >1 mL; having CT scans only without PET imaging; and lacking measurable disease by Lugano criteria.

**Supplementary Table 1. Demographics and baseline characteristics of the PET ITT and GOYA ITT****populations**

|                                                             | PET ITT<br>(N = 1,305)           | GOYA ITT<br>(N = 1,414)          |
|-------------------------------------------------------------|----------------------------------|----------------------------------|
| Median age, years (range)                                   | 62.0 (18–86)                     | 62.0 (18–86)                     |
| Male, n (%)                                                 | 691 (53.0)                       | 750 (53.0)                       |
| Geographic region, n (%)                                    |                                  |                                  |
| Eastern Europe                                              | 160 (12.3)                       | 196 (13.9)                       |
| Western Europe                                              | 399 (30.6)                       | 426 (30.1)                       |
| North America                                               | 208 (15.9)                       | 216 (15.3)                       |
| Asia                                                        | 484 (37.1)                       | 514 (36.4)                       |
| Other                                                       | 54 (4.1)                         | 62 (4.4)                         |
| Median time from diagnosis to randomization, months (range) | [N = 1,300]<br>0.79 (0.0–36.3)   | [N = 1,408]<br>0.79 (0.0–36.3)   |
| ECOG PS, n (%)                                              | [N = 1,304]                      | [N = 1,413]                      |
| 0–1                                                         | 1143 (87.7)                      | 1228 (86.9)                      |
| 2                                                           | 161 (12.3)                       | 185 (13.1)                       |
| Ann Arbor stage, n (%)                                      | [N = 1,305]                      | [N = 1,413]                      |
| I or II                                                     | 314 (24.1)                       | 340 (24.1)                       |
| III or IV                                                   | 991 (75.9)                       | 1073 (75.9)                      |
| IPI risk score, n (%)                                       |                                  |                                  |
| 0–2                                                         | 734 (56.2)                       | 782 (55.3)                       |
| 3–5                                                         | 571 (43.8)                       | 632 (44.7)                       |
| Serum LDH elevated, n (%)                                   | [N = 1,301]<br>748 (57.5)        | [N = 1,409]<br>591 (41.9)        |
| Extranodal involvement, n (%)                               | 877 (67.2)                       | 950 (67.2)                       |
| Median SPD, mm (range)                                      | [N = 1,302]<br>4,395 (0–510,000) | [N = 1,410]<br>4,447 (0–510,000) |
| Cell-of-origin, n (%)                                       | [N = 861]                        | [N = 933]                        |
| GCB                                                         | 494 (57.4)                       | 540 (57.9)                       |
| ABC                                                         | 227 (26.4)                       | 243 (26.0)                       |
| Unclassified                                                | 140 (16.3)                       | 150 (16.1)                       |

ABC, activated B-cell-like; ECOG PS, Eastern Cooperative Oncology Group performance status; GCB, germinal center B-cell-like; IPI, International Prognostic Index; ITT, intent-to-treat; LDH, lactate dehydrogenase; PET, positron emission tomography; SPD, sum of products of diameters of up to six target lesions.

**Supplementary Table 2. Demographics and baseline characteristics according to high ( $\geq$  median) or low ( $<$  median) baseline TLG in the PET ITT population (n = 1,305)**

|                                                             | High TLG<br>(N = 653)        | Low TLG<br>(N = 652)           | P-value* |
|-------------------------------------------------------------|------------------------------|--------------------------------|----------|
| Median age, years (range)                                   | 61.0 (18–86)                 | 63.0 (18–85)                   | 0.002    |
| Male, n (%)                                                 | 366 (56.0)                   | 325 (49.8)                     | 0.027    |
| Median time from diagnosis to randomization, months (range) | [N = 650]<br>0.69 (0.0–36.3) | [N = 650]<br>0.95 (0.0–8.7)    | 0        |
| Ann Arbor stage, n (%)                                      |                              |                                | 0        |
| I or II                                                     | 116 (17.8)                   | 198 (30.4)                     |          |
| III or IV                                                   | 537 (82.2)                   | 454 (69.6)                     |          |
| IPI score, n (%)                                            |                              |                                | 0        |
| 0–2                                                         | 265 (40.6)                   | 470 (72.1)                     |          |
| 3                                                           | 235 (36.0)                   | 139 (21.3)                     |          |
| 4–5                                                         | 153 (23.4)                   | 43 (6.6)                       |          |
| ECOG PS, n (%)                                              | [N = 652]                    | –                              | 0        |
| 0–1                                                         | 535 (82.1)                   | 609 (93.4)                     |          |
| 2–3                                                         | 117 (18.0)                   | 43 (6.6)                       |          |
| Any extranodal involvement, n (%)                           | 467 (71.5)                   | 409 (62.7)                     | 0.0008   |
| Serum LDH elevated, n (%)                                   | [N = 650] 518 (79.7)         | [N = 651] 227 (34.9)           | 0        |
| Median SPD, mm (range)                                      | 7,880<br>(160–510,000)       | [N = 649] 2,557<br>(0–194,400) | 0        |
| Cell-of-origin subtype, n (%)                               | [N = 428]                    | [N = 433]                      | 0.877    |
| GCB                                                         | 249 (58.2)                   | 245 (56.6)                     |          |
| ABC                                                         | 110 (25.7)                   | 117 (27.0)                     |          |
| Unclassified                                                | 69 (16.1)                    | 71 (16.4)                      |          |

\*Kruskal-Wallis rank sum test (numeric variables) or Fisher's exact test (categorical variables)

ABC, activated B-cell-like; ECOG PS, Eastern Cooperative Oncology Group performance status; GCB, germinal center B-cell-like; IPI, International Prognostic Index; ITT, intent to treat; LDH, lactate dehydrogenase; PET, positron emission tomography; SPD, sum of products of diameter of up to six target lesions; TLG, total lesion glycolysis

**Supplementary Table 3. Demographics and baseline characteristics according to baseline TMTV and TLG**

**quartiles in the PET ITT population (n = 1,305)**

|                                                             | TMTV quartiles                                    |                                                     |                                                     |                                                        | TLG quartiles                                     |                                                       |                                                         |                                                          |
|-------------------------------------------------------------|---------------------------------------------------|-----------------------------------------------------|-----------------------------------------------------|--------------------------------------------------------|---------------------------------------------------|-------------------------------------------------------|---------------------------------------------------------|----------------------------------------------------------|
|                                                             | Q1<br>(1 to<br>103 cm <sup>3</sup> )<br>(N = 326) | Q2<br>(104 to<br>351 cm <sup>3</sup> )<br>(N = 326) | Q3<br>(351 to<br>879 cm <sup>3</sup> )<br>(N = 326) | Q4<br>(879 to<br>17,115 cm <sup>3</sup> )<br>(N = 327) | Q1<br>(1 to<br>876 cm <sup>3</sup> )<br>(N = 326) | Q2<br>(880 to<br>2,951 cm <sup>3</sup> )<br>(N = 326) | Q3<br>(2,954 to<br>7,810 cm <sup>3</sup> )<br>(N = 326) | Q4<br>(7,811 to<br>54,600 cm <sup>3</sup> )<br>(N = 327) |
| Median age, years (range)                                   | 63.5<br>(19–85)                                   | 61.0<br>(18–84)                                     | 61.0<br>(18–86)                                     | 61.0<br>(18–82)                                        | 63.0<br>(19–85)                                   | 62.0<br>(18–84)                                       | 61.0<br>(18–86)                                         | 60.0<br>(18–82)                                          |
| Male, n (%)                                                 | 162 (49.7)                                        | 163 (50.0)                                          | 180 (55.2)                                          | 186 (56.9)                                             | 154 (47.2)                                        | 171 (52.5)                                            | 179 (54.9)                                              | 187 (57.2)                                               |
| Median time from diagnosis to randomization, months (range) | 1.05<br>(0.0–8.7)                                 | 0.89<br>(0.1–5.3)                                   | 0.72<br>(0.0–13.2)                                  | 0.69<br>(0.1–36.3)                                     | 1.08<br>(0.0–8.7)                                 | 0.89<br>(0.1–5.3)                                     | 0.72<br>(0.0–36.3)                                      | 0.69<br>(0.1–7.5)                                        |
| Ann Arbor stage, n (%)                                      |                                                   |                                                     |                                                     |                                                        |                                                   |                                                       |                                                         |                                                          |
| I or II                                                     | 108 (33.1)                                        | 110 (33.7)                                          | 68 (20.9)                                           | 28 (8.6)                                               | 105 (32.2)                                        | 93 (28.5)                                             | 79 (24.2)                                               | 37 (11.3)                                                |
| III or IV                                                   | 218 (66.9)                                        | 216 (66.3)                                          | 258 (79.1)                                          | 299 (91.4)                                             | 221 (67.8)                                        | 233 (71.5)                                            | 247 (75.8)                                              | 290 (88.7)                                               |
| IPI score, n (%)                                            |                                                   |                                                     |                                                     |                                                        |                                                   |                                                       |                                                         |                                                          |
| 0–2                                                         | 258 (79.1)                                        | 220 (67.5)                                          | 163 (50.0)                                          | 93 (28.4)                                              | 258 (79.1)                                        | 211 (64.7)                                            | 170 (52.1)                                              | 95 (29.1)                                                |
| 3                                                           | 55 (16.9)                                         | 80 (24.5)                                           | 107 (32.8)                                          | 132 (40.4)                                             | 56 (17.2)                                         | 84 (25.8)                                             | 98 (30.1)                                               | 136 (41.6)                                               |
| 4–5                                                         | 13 (4.0)                                          | 26 (8.0)                                            | 56 (17.2)                                           | 102 (31.2)                                             | 12 (3.7)                                          | 31 (9.5)                                              | 58 (17.8)                                               | 96 (29.4)                                                |
| ECOG PS 2, n (%)                                            | 27 (8.3)                                          | 17 (5.2)                                            | 37 (11.3)                                           | 80 (24.5)                                              | 23 (7.1)                                          | 20 (6.1)                                              | 41 (12.6)                                               | 77 (23.5)                                                |
| Any extranodal involvement, n (%)                           | 209 (64.1)                                        | 198 (60.7)                                          | 224 (68.7)                                          | 246 (75.2)                                             | 202 (62.0)                                        | 207 (63.5)                                            | 223 (68.4)                                              | 245 (74.9)                                               |
| Serum LDH elevated, n (%)                                   | 76 (23.4)                                         | 162 (49.7)                                          | 230 (71.2)                                          | 280 (85.6)                                             | 83 (25.5)                                         | 149 (45.7)                                            | 232 (71.8)                                              | 284 (86.9)                                               |
| Median SPD, mm (range)                                      | 1,536<br>(108–<br>13,501)                         | 4,113 (0–<br>194,400)                               | 6,288<br>(160–<br>510,000)                          | 10,563 (595–<br>56,572)                                | 1,553 (108–<br>13,501)                            | 3,846 (0–<br>194,400)                                 | 6,175 (160–<br>510,000)                                 | 10,674<br>(300–<br>56,572)                               |
| Cell-of-origin subtype, n (%)                               | [N = 226]                                         | [N = 213]                                           | [N = 201]                                           | [N = 221]                                              | [N = 224]                                         | [N = 209]                                             | [N = 200]                                               | [N = 228]                                                |
| GCB                                                         | 117 (51.8)                                        | 131 (61.5)                                          | 112 (55.7)                                          | 134 (60.6)                                             | 120 (53.6)                                        | 125 (59.8)                                            | 121 (60.5)                                              | 128 (56.1)                                               |
| ABC                                                         | 64 (28.3)                                         | 58 (27.2)                                           | 50 (24.9)                                           | 55 (24.9)                                              | 61 (27.2)                                         | 56 (26.8)                                             | 45 (22.5)                                               | 65 (28.5)                                                |
| Unclassified                                                | 45 (19.9)                                         | 24 (11.3)                                           | 39 (19.4)                                           | 32 (14.5)                                              | 43 (19.2)                                         | 28 (13.4)                                             | 34 (17.0)                                               | 35 (15.4)                                                |

ABC, activated B-cell-like; ECOG PS, Eastern Cooperative Oncology Group performance status; GCB, germinal center B-cell-like; IPI, International Prognostic Index; ITT, intent to treat; LDH, lactate dehydrogenase; PET, positron emission tomography; Q, quartile; SPD, sum of products of diameter of up to six target lesions; TLG, total lesion glycolysis; TMTV, total metabolic tumor volume.

**Supplementary Table 4. Cox multivariate regression model evaluating effect of TMTV and TLG in addition to IPI categories on investigator-assessed progression-free survival**

| Covariate                          | Hazard ratio (95% CI) | P-value* |
|------------------------------------|-----------------------|----------|
| TMTV (366 cm <sup>3</sup> cut-off) |                       |          |
| TMTV (high v low)                  |                       | 0.002    |
| IPI 0–2                            | 1.59 (1.18, 2.14)     |          |
| IPI 3–5                            | 1.93 (1.41, 2.65)     |          |
| IPI (3–5 v 0–2)                    |                       | 0.114    |
| Low TMTV                           | 1.31 (0.94, 1.83)     |          |
| High TMTV                          | 1.59 (1.21, 2.08)     |          |
| TLG (3,004 g)                      |                       |          |
| TLG (high v low)                   |                       | 0.016    |
| IPI 0–2                            | 1.44 (1.07, 1.94)     |          |
| IPI 3–5                            | 1.64 (1.21, 2.23)     |          |
| IPI (3–5 v 0–2)                    |                       | 0.031    |
| Low TLG                            | 1.43 (1.03, 1.97)     |          |
| High TLG                           | 1.64 (1.24, 2.13)     |          |

\*Wald test

Hazard ratios adjusted for treatment group (obinutuzumab v rituximab), geographic region, gender and SPD.

CI, confidence interval; IPI, International Prognostic Index; TLG, total lesion glycolysis; TMTV, total metabolic tumor volume



**Supplementary Table 5. Cox multivariate regression model for the cell-of-origin subpopulation evaluating effect of TMTV in addition to IPI categories on investigator-assessed progression-free survival**

| Covariate                          | Hazard ratio (95% CI) | P-value* |
|------------------------------------|-----------------------|----------|
| TMTV (366 cm <sup>3</sup> cut-off) |                       |          |
| TMTV (high v low)                  |                       | 0.006    |
| IPI 0–2                            | 1.71 (1.16, 2.50)     |          |
| IPI 3–5                            | 1.59 (1.11, 2.29)     |          |
| IPI (3–5 v 0–2)                    |                       | 0.017    |
| Low TMTV                           | 1.61 (1.09, 2.38)     |          |
| High TMTV                          | 1.50 (1.06, 2.12)     |          |

\*Wald test

Hazard ratios adjusted for treatment group (obinutuzumab v rituximab), cell-of-origin category (GCB v ABC/unclassified), geographic region, sex and SPD.

ABC, activated B-cell-like; CI, confidence interval; GCB, germinal center B-cell-like; IPI, International Prognostic Index; SPD, sum of products of diameters of up to six target lesions; TMTV, total metabolic tumor volume

**Supplementary Figure 1. Multivariable Cox regression model evaluating factors associated with investigator-assessed PFS and (A) high TMTV ( $\geq 366 \text{ cm}^3$ ) or (B) high TLG ( $\geq$  median; PET ITT population; n = 1,305)**

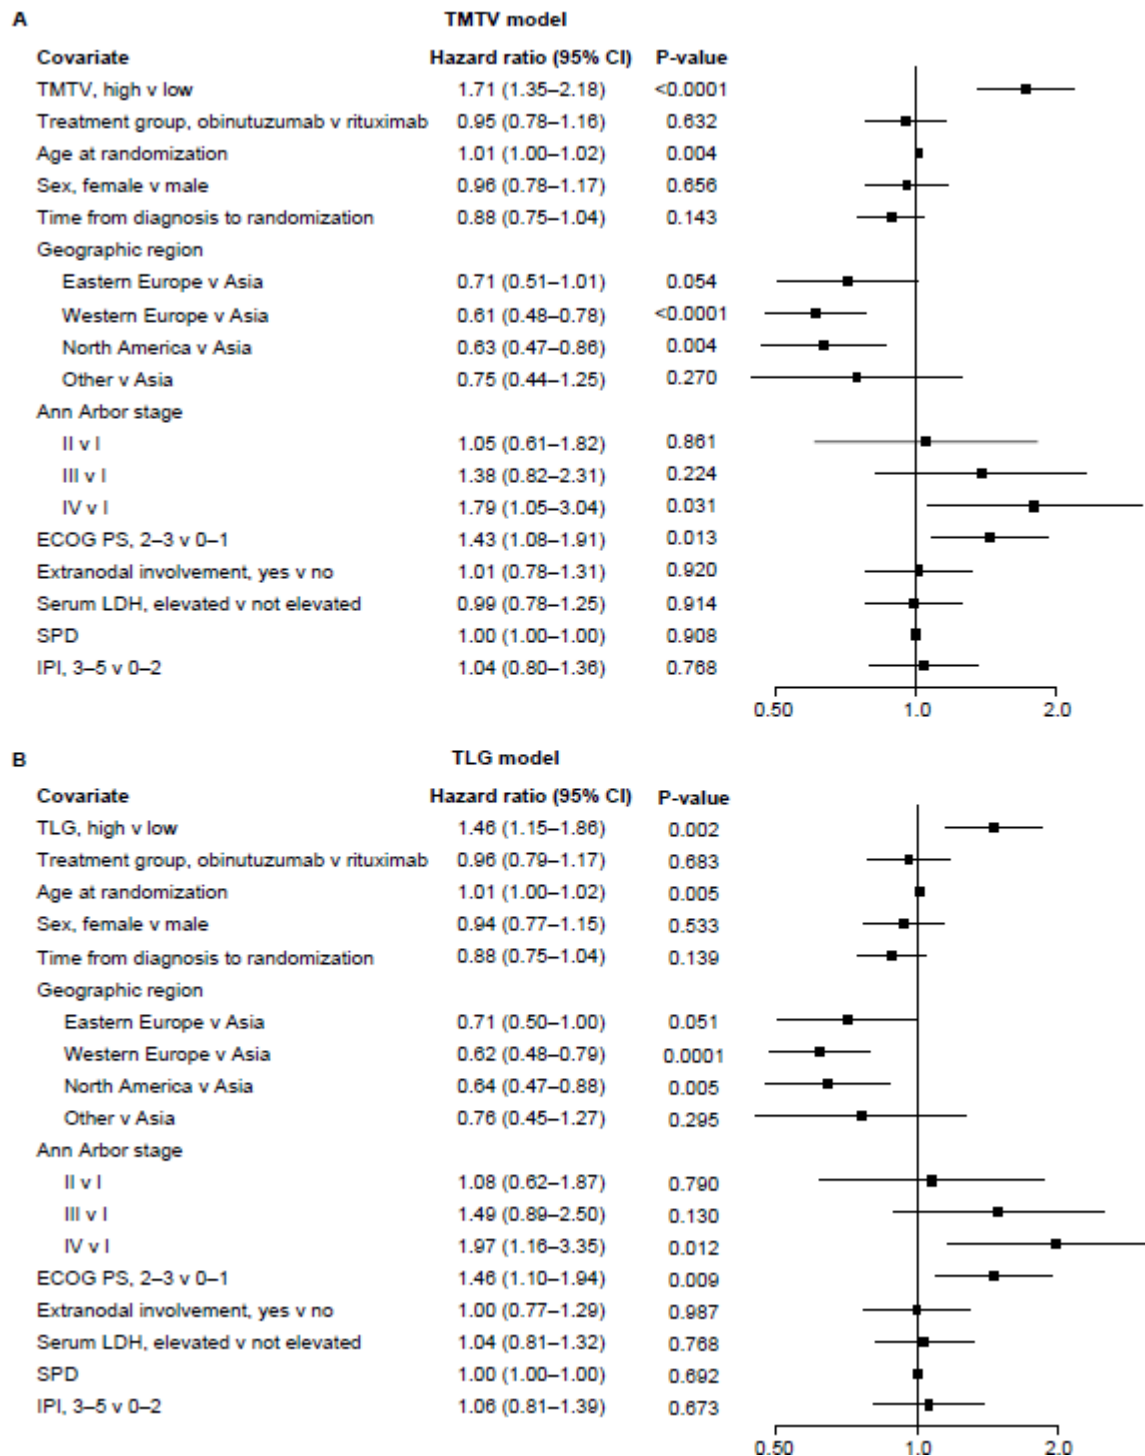

CI, confidence interval; ECOG PS, Eastern Cooperative Oncology Group performance status; IPI, International Prognostic Index; ITT, intent to treat; LDH, lactate dehydrogenase; PET, positron

emission tomography; PFS, progression-free survival; SPD, sum of products of diameters of up to six target lesions; TMTV, total metabolic tumor volume; TLG, total lesion glycolysis.

**Supplementary Figure 2. Kaplan–Meier analysis of investigator-assessed progression-free survival according to baseline TMTV quartiles in patients with IPI scores of (A) 0–2 and (B) 3–5**

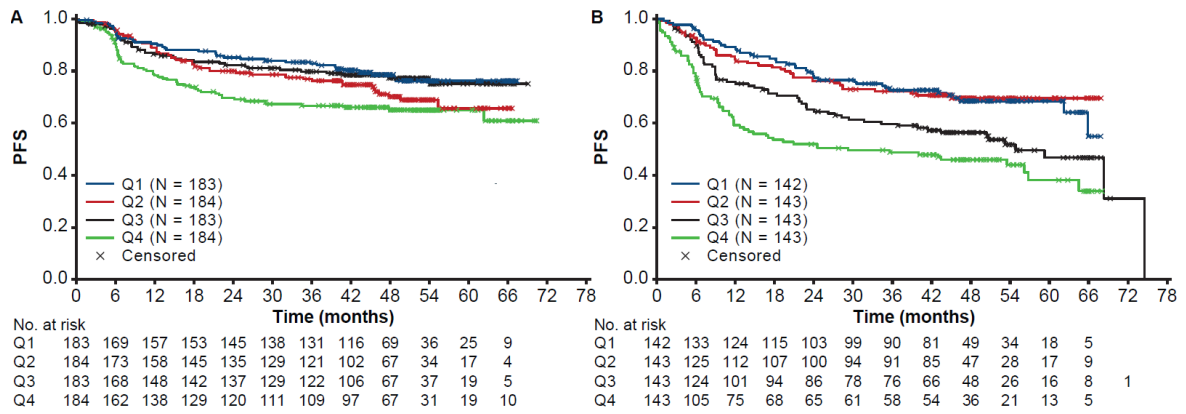

IPI, International Prognostic Index; Q, quartile; TMTV, total metabolic tumor volume.

**Supplementary Figure 3. Kaplan–Meier analysis of investigator-assessed progression-free survival according to baseline TMTV quartiles for patients in the (A) low IPI group and (B) high IPI group, and according to baseline TLG quartiles in patients in the (C) low IPI group and (D) high IPI group**

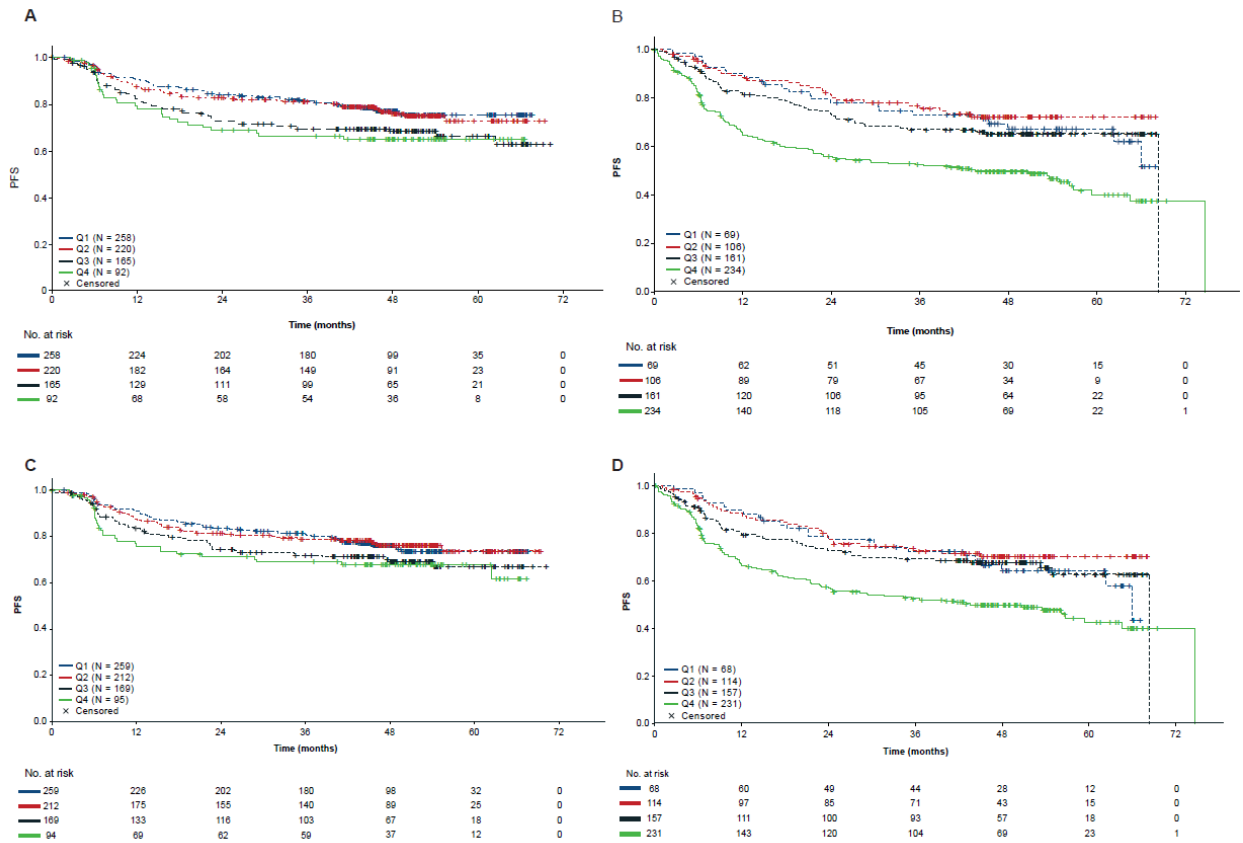

IPI, International Prognostic Index; TLG, total lesion glycolysis; TMTV, total metabolic tumor volume.

**Supplementary Figure 4. Kaplan–Meier analysis of overall survival according to baseline TMTV cut-offs of (A) 366 cm<sup>3</sup> and (B) 300 cm<sup>3</sup>**

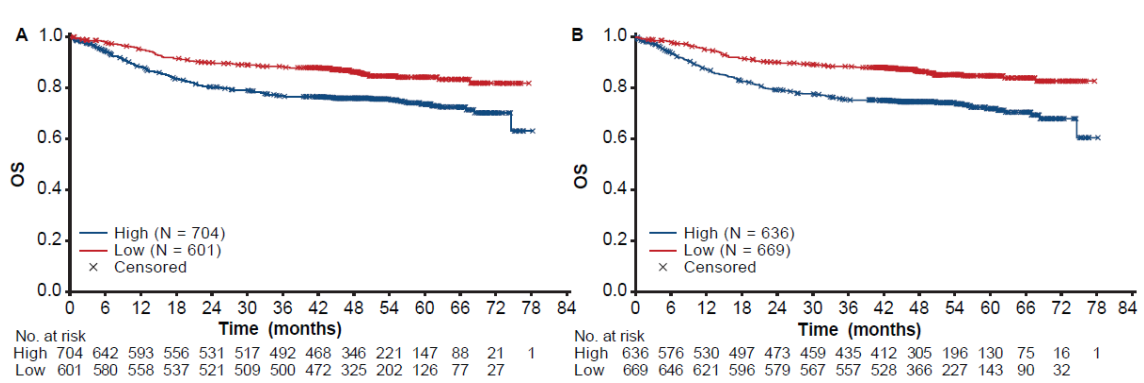

TMTV, total metabolic tumor volume.

Supplementary Figure 5. SUV<sub>max</sub> receiver operating characteristic curve for 2-year progression-free survival

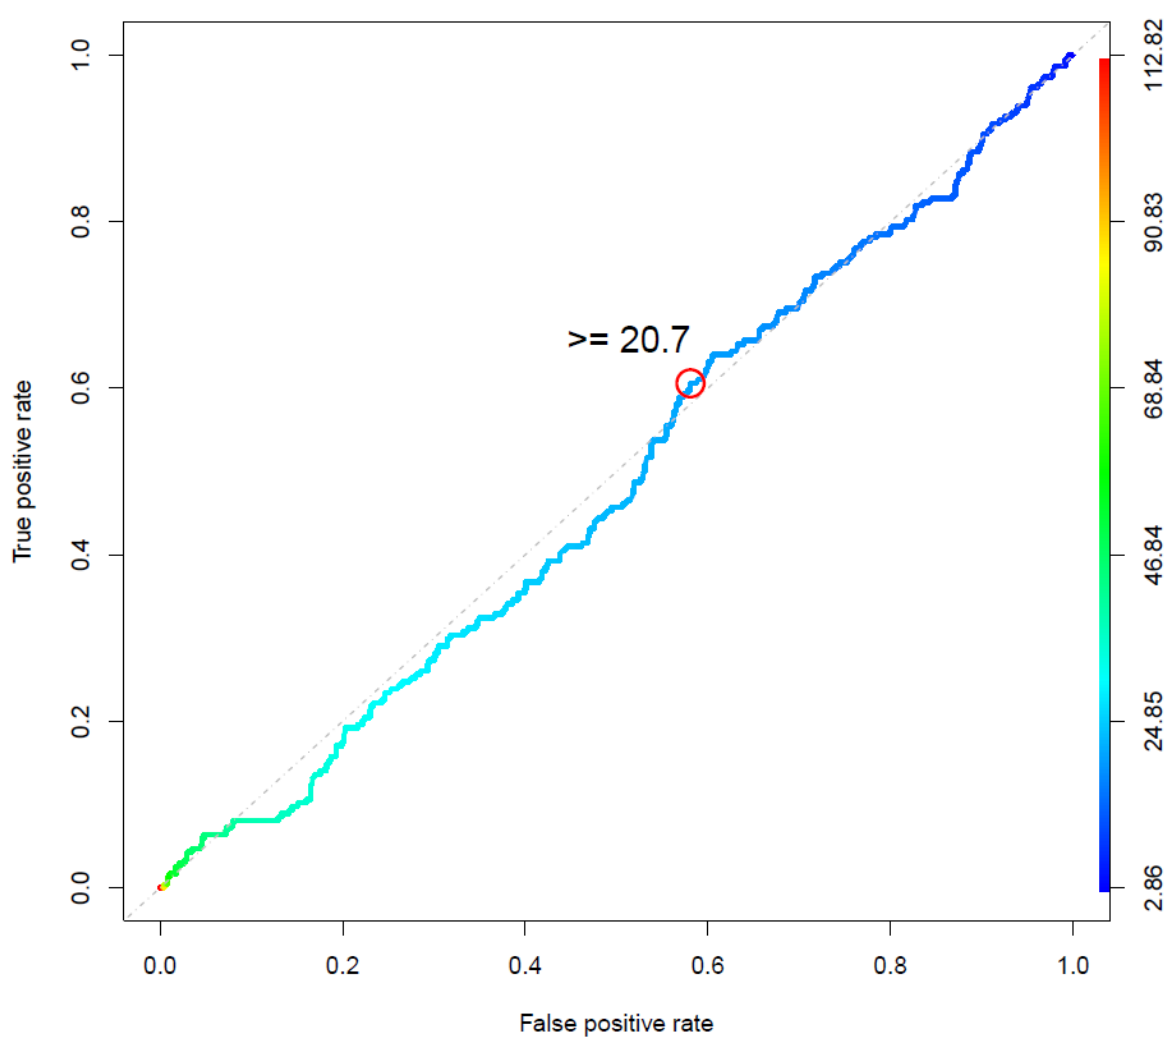

SUV<sub>max</sub>, maximum standardized uptake value.

Supplementary Figure 6. Kaplan–Meier analysis of investigator-assessed progression-free survival according to baseline TMTV quartiles in patients with (A) GCB subtype and (B) ABC/unclassified subtype, and according to baseline TLG quartiles in patients with (C) GCB subtype and (D) ABC/unclassified subtype

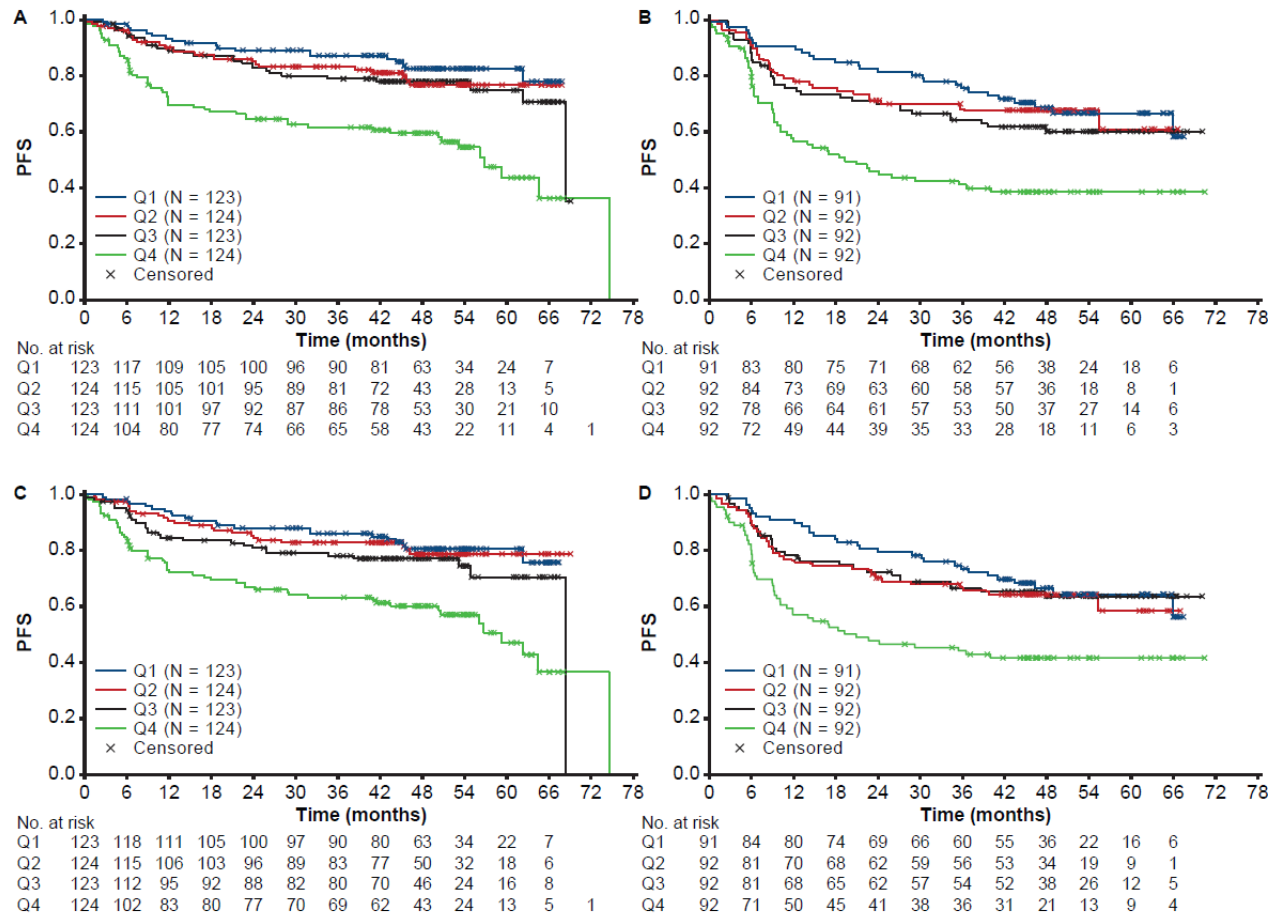

ABC, activated B-cell-like; GCB, germinal center B-cell-like; Q, quartile; TLG, total lesion glycolysis; TMTV, total metabolic tumor volume.
